# Supplementary material
Source: PubMed Central journal article supplement (PMC3113241)
Supplement: mmc1.pdf [file mmc1.pdf]

**The American Journal of Human Genetics, Volume 88**

**Supplemental Data**

**A Revised Root for the Human Y Chromosomal**

**Phylogenetic Tree: The Origin of Patrilineal**

**Diversity in Africa**

**Fulvio Cruciani, Beniamino Trombetta, Andrea Massaia, Giovanni Destro-Bisol, Daniele Sellitto, and Rosaria Scozzari**

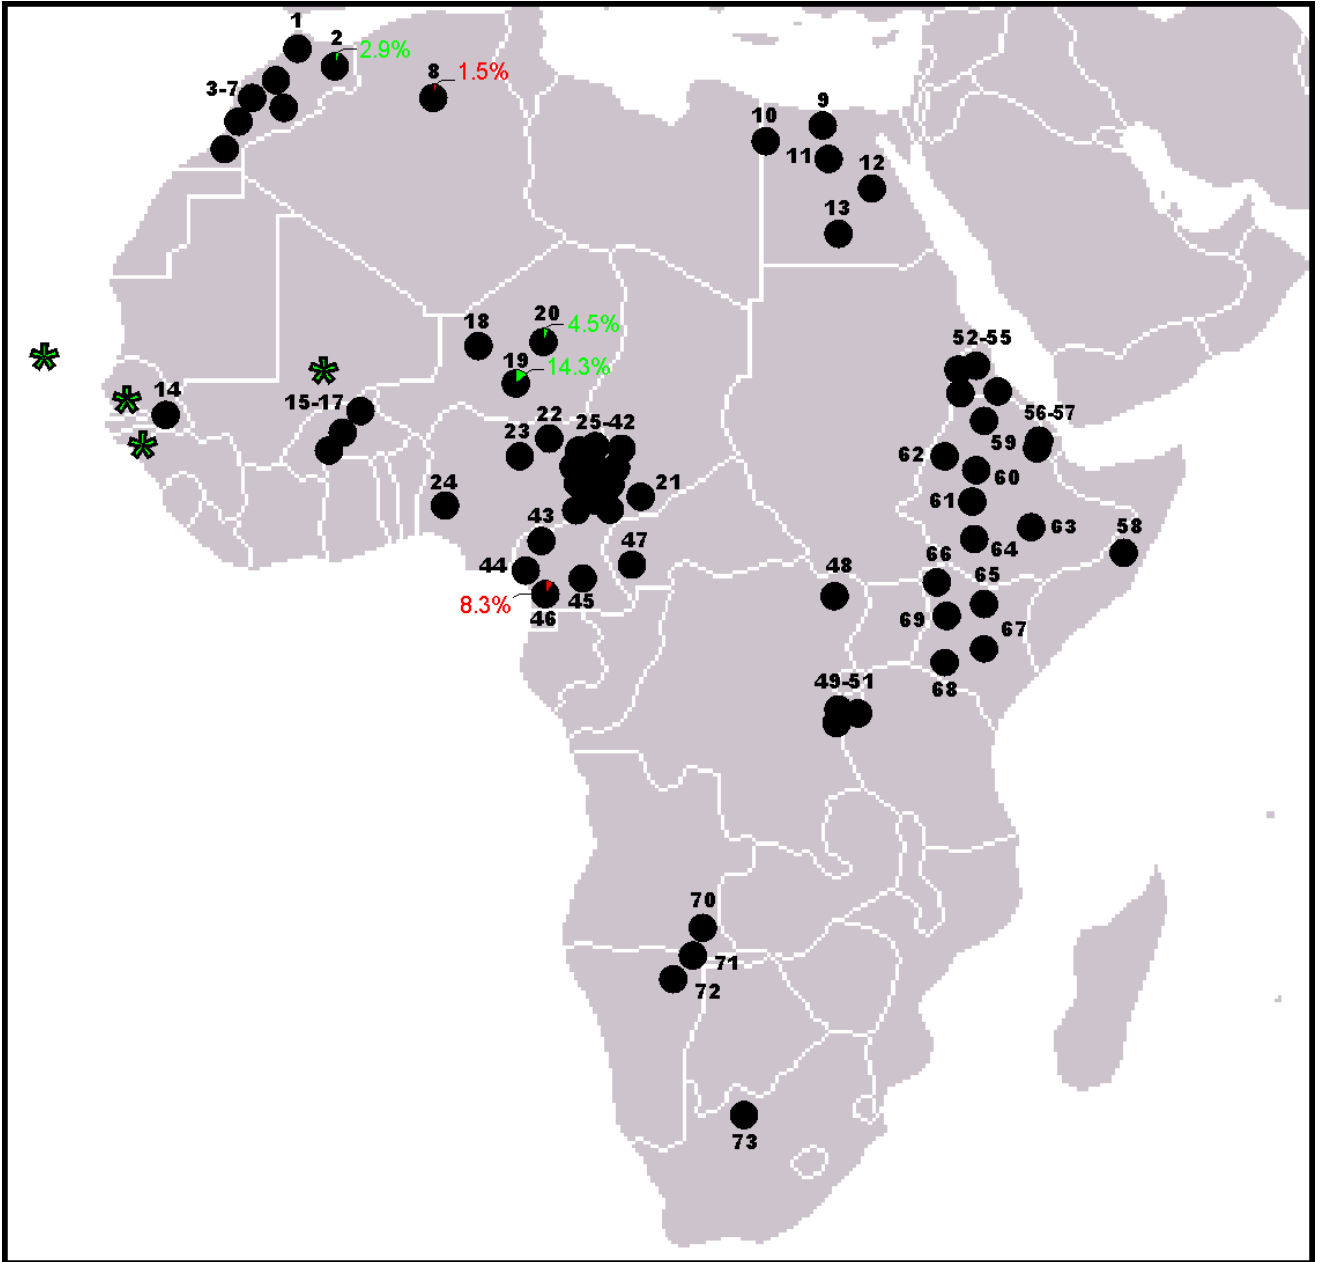

**Figure S1. Map Showing Location of the Population Samples Considered in This Study**  
 Populations are represented by circles and numbered as in Table S5. Sectors within circles are proportional to the frequency of haplogroup A1a (green), A1b (red) and A2-T (black). Green asterisks indicate countries where haplogroup A1a has previously been observed.<sup>10,30-32</sup>

**Table S1. Haplogroup Affiliation of the Seven Chromosomes that Were Re-sequenced**

| Sample | Haplogroup (by lineage) | Haplogroup (by mutation)                              |
|--------|-------------------------|-------------------------------------------------------|
| 1      | A1a                     | A-M31                                                 |
| 2      | A1b                     | A-P114                                                |
| 3      | A2c                     | A-P262                                                |
| 4      | A3b2*(×A3b2a,b)         | A-M13* (×M171,M118)                                   |
| 5      | B2a1a                   | B-M109                                                |
| 6      | C*(×C1,2,3,4,5,6)       | C-RPS4Y <sub>711</sub> * (×M8,M38,M217,M347,M356,P55) |
| 7      | R1b1*(×R1b1a,b,c)       | R-P25*(×M18,P297,M335)                                |

Haplogroup nomenclature according to Karafet et al.<sup>13</sup>

| Haplogroup | TMRCA [SE]<br>(rho estimates) | TMRCA [SE]<br>(ML estimates) |
|------------|-------------------------------|------------------------------|
| Y-Root     | 141.5 [15.6]                  | 141.0 [16.0]                 |
| A1a-T      | 107.6 [12.2]                  | 102.0 [10.0]                 |
| A2-T       | 104.9 [13.1]                  | 97.0 [10.0]                  |
| BT         | 74.5 [12.5]                   | 63.0 [9.0]                   |
| CT         | 38.8 [9.7]                    | 35.0 [7.0]                   |

**Table S3: Coalescence age estimates (kyears) of relevant haplogroups in the human Y chromosome phylogeny.**

Rho estimates were obtained using the network 4.6 program.

ML estimates were obtained using the PAML 4.4 program and assuming a HKY85 mutational model (estimated tree length = 0.00069).

**Table S5: Populations considered for the mutations defining major clades A1b, A1a and A2-T.**

| <b>Region/population</b>      | <b>Country</b>   | <b>N</b> | <b>References</b> |
|-------------------------------|------------------|----------|-------------------|
| <i>Northern Africa</i>        |                  |          |                   |
| 1 Moroccan Arabs              | Morocco          | 55       | a,b,c,d,f         |
| 2 Moyen Atlas Berbers         | Morocco          | 69       | a,b,c,d,f         |
| 3 Asni Berbers                | Morocco          | 54       | c,d,f             |
| 4 Bohuria Berbers             | Morocco          | 67       | c,d,f             |
| 5 Marrakech Berbers           | Morocco          | 27       | b,c,d,f           |
| 6 Souss Berbers               | Morocco          | 34       | d,f               |
| 7 Ouarzazate Berbers          | Morocco          | 32       | d,f               |
| 8 Mozabite Berbers            | Algeria          | 67       | b,c,d,f           |
| 9 Northern Egyptians          | Egypt            | 49       | b,c,d,f           |
| 10 Egyptian Berbers from Siwa | Egypt            | 93       | c,d,f             |
| 11 Egyptians from Baharia     | Egypt            | 41       | c,d,f             |
| 12 Egyptians from Gurna Oasis | Egypt            | 34       | c,d,f             |
| 13 Southern Egyptians         | Egypt            | 69       | b,c,d,f           |
| <i>Western Africa</i>         |                  |          |                   |
| 14 Mandenka                   | Senegal          | 16       | b                 |
| 15 Mossi                      | Burkina Faso     | 49       | a                 |
| 16 Rimaibe                    | Burkina Faso     | 37       | a                 |
| 17 Fulbe from Burkina Faso    | Burkina Faso     | 21       | a                 |
| <i>Central Africa</i>         |                  |          |                   |
| 18 Songhai                    | Niger            | 10       | b,d,f             |
| 19 Fulbe from Niger           | Niger            | 7        | b,d,f             |
| 20 Tuareg                     | Niger            | 22       | b,d,f             |
| 21 Ngambai                    | Chad             | 11       | a,d,f             |
| 22 Hausa                      | Nigeria (North)  | 10       | b,d,f             |
| 23 Fulbe from Nigeria         | Nigeria (North)  | 32       | b                 |
| 24 Yoruba                     | Nigeria (South)  | 21       | b,d,f             |
| 25 Ouldeme                    | Cameroon (North) | 24       | a,d,e             |
| 26 Mada                       | Cameroon (North) | 17       | d,f               |
| 27 Mafa                       | Cameroon (North) | 9        | d,e,f             |
| 28 Guiziga                    | Cameroon (North) | 9        | d,f               |
| 29 Daba                       | Cameroon (North) | 29       | a,d,e,f           |
| 30 Guidar                     | Cameroon (North) | 9        | d,f               |
| 31 Massa                      | Cameroon (North) | 7        | d,f               |
| 32 Mandara                    | Cameroon (North) | 82       | e,f               |
| 33 Podowko                    | Cameroon (North) | 5        | e,f               |
| 34 Other Chadic               | Cameroon (North) | 8        | a,d,e,f           |
| 35 Shuwa Arabs                | Cameroon (North) | 5        | d,f               |
| 36 Kanuri                     | Cameroon (North) | 7        | a,d,f             |
| 37 Fulbe from Cameroon        | Cameroon (North) | 76       | a,d,e,f           |
| 38 Moundang                   | Cameroon (North) | 21       | d,f               |
| 39 Toupouri                   | Cameroon (North) | 31       | e,f               |
| 40 Fali                       | Cameroon (North) | 105      | a,d,e,f           |
| 41 Tali                       | Cameroon (North) | 22       | a,d,f             |
| 42 Mboum                      | Cameroon (North) | 11       | d,e,f             |
| 43 Bamileke                   | Cameroon (South) | 52       | a,e,f             |
| 44 Bakaka                     | Cameroon (South) | 12       | a                 |
| 45 Ewondo                     | Cameroon (South) | 32       | a,d,e,f           |
| 46 Bakola Pygmies             | Cameroon (South) | 36       | f                 |
| 47 Biaka Pygmies              | CAR              | 33       | a,b,d,f           |
| <i>Eastern Africa</i>         |                  |          |                   |

|    |                        |                 |    |         |
|----|------------------------|-----------------|----|---------|
| 48 | Mbuti Pygmies          | DRC             | 13 | a,b,d,f |
| 49 | Twa Pygmies            | Burundi         | 7  | d,f     |
| 50 | Tutsi                  | Burundi         | 9  | d,f     |
| 51 | Hutu                   | Burundi         | 14 | d,f     |
| 52 | Cunama                 | Eritrea         | 20 | d,f     |
| 53 | Nara                   | Eritrea         | 15 | d,f     |
| 54 | Tigrai                 | Eritrea         | 28 | d,f     |
| 55 | Tigre                  | Eritrea         | 5  | d,f     |
| 56 | Afar Djibuti           | Djibuti         | 25 | d,f     |
| 57 | Somali Djibuti         | Djibuti         | 40 | d,f     |
| 58 | Somali Somalia         | Somalia         | 23 | b,c,d,f |
| 59 | Tigrai                 | Ethiopia        | 5  | b,c,d,f |
| 60 | Amhara                 | Ethiopia        | 83 | b,c,d,f |
| 61 | Gurage                 | Ethiopia        | 7  | b,c,d,f |
| 62 | Ethiopian Jews         | Ethiopia        | 22 | a       |
| 63 | Oromo                  | Ethiopia        | 62 | b,c,d,f |
| 64 | Wolayta                | Ethiopia        | 12 | b,c,d,f |
| 65 | Borana                 | Kenya           | 8  | b,c,d,f |
| 66 | Nilotic                | Kenya           | 62 | b,c,d,f |
| 67 | Kikuyu                 | Kenya           | 8  | b,c,d,f |
| 68 | Luhya                  | Kenya           | 51 | b,c,d,f |
| 69 | Other Bantu            | Kenya           | 11 | b,c,d,f |
|    | <i>Southern Africa</i> |                 |    |         |
| 70 | !Kung                  | Angola          | 64 | a       |
| 71 | Khwe                   | Namibia         | 26 | a       |
| 72 | San                    | Namibia         | 7  | b,c,d,f |
| 73 | Bantu                  | Southern Africa | 8  | b,c,d,f |

<sup>a</sup> Cruciani et al.<sup>24</sup>

<sup>b</sup> Cruciani et al.<sup>25</sup>

<sup>c</sup> Cruciani et al.<sup>26</sup>

<sup>d</sup> Cruciani et al.<sup>27</sup>

<sup>e</sup> Cruciani et al.<sup>28</sup>

<sup>f</sup> Present study
